# Supplementary material for: Systematic Review of the Potential of MicroRNAs in Diffuse Large B Cell Lymphoma
Source: PubMed Central journal article supplement (PMC6406874; doi:10.3390/cancers11020144), 2019-01-26
Supplement: cancers-11-00144-s001.pdf [file cancers-11-00144-s001.pdf]

## Supplementary Materials: Systematic Review of the Potential Of MicroRNAs in Diffuse Large B Cell Lymphoma

Ane Larrabeiti-Etxebarria, Maria Lopez-Santillan, Borja Santos-Zorroza, Elixabet Lopez-Lopez and Africa Garcia-Orad

**Table S1.** Differentially expressed microRNAs in DLBCL patients compared with healthy control individuals.

| Significant miRNAs | Result | n DLBCL | n Control | Sample source | Method     | N° miRNAs   | Reference     |
|--------------------|--------|---------|-----------|---------------|------------|-------------|---------------|
| miR-155            | up     | 29      | 32 (RLH)  | Tissue        | qRT-PCR    | 1           | Li 2017 [1]   |
| miR-4532           | up     |         |           |               |            |             |               |
| miR-1915-3p        | up     |         |           |               |            |             |               |
| miR-187-3p         | up     |         |           |               |            |             |               |
| miR-4485           | up     |         |           |               |            |             |               |
| miR-4284           | up     |         |           |               |            |             |               |
| miR-4508           | up     |         |           |               |            |             |               |
| miR-1973           | up     |         |           |               |            |             |               |
| miR-663a           | up     |         |           |               |            |             | Jia 2017      |
| miR-877-5p         | up     |         |           |               |            |             |               |
| miR-3195           | up     | 5       | 4 (RLH)   | Tissue        | nanostring | 800         |               |
| miR-596            | up     |         |           |               |            |             |               |
| miR-4516           | up     |         |           |               |            |             |               |
| miR-4488           | up     |         |           |               |            |             |               |
| miR-636            | up     |         |           |               |            |             |               |
| miR-27b-3p*        | down   |         |           |               |            |             |               |
| miR-150-5p         | down   |         |           |               |            |             |               |
| miR-200b-3p        | down   |         |           |               |            |             |               |
| miR-205-5p         | down   |         |           |               |            |             |               |
| miR-342-3p         | down   |         |           |               |            |             |               |
| miR-203            | down   |         |           |               |            |             |               |
| miR-21             | up     | 55      | 20 (NLN)  | FF and FFPE   | qRT-PCR    | 1           | Liu 2017      |
| miR-21             | up     | 26      | 10 (NLN)  | FFPE          | qRT-PCR    | 1           | Song 2017     |
| miR-10a            | down   | 9       | 9 (RLH)   | FF            | qRT-PCR    | 1           | Fan 2016      |
| miR-23a            | up     | 104     | 28        | FFPE          | qRT-PCR    | 1           | Wang 2014     |
| mir-146b           | down   | 106     | 30 (RLH)  | FFPE          | qRT-PCR    | 939         | Wu 2014       |
| mir-320d           | down   |         |           |               |            |             |               |
| miR-4284           | up     |         |           |               |            |             |               |
| miR-21-5p          | up     |         |           |               |            |             |               |
| miR-142-3p         | up     |         |           |               |            |             |               |
| miR-155-5p         | up     |         |           |               |            |             |               |
| miR-3182           | up     |         |           |               |            |             |               |
| miR-16-5p          | up     |         |           |               |            |             |               |
| miR-142-5p         | up     |         |           |               |            |             |               |
| miR-451a           | up     |         |           |               |            |             |               |
| miR-29b-3p         | up     |         |           |               |            |             |               |
| miR-4301           | up     |         |           |               |            |             |               |
| miR-146a-5p        | up     |         |           |               |            |             |               |
| miR-146b-5p        | up     |         |           |               |            |             |               |
| miR-29a-3p         | up     | 24      | 14 (NLN)  | FFPE          | array      | 3100 probes | Tamaddon 2016 |
| miR-342-3p         | up     |         |           |               |            |             |               |
| miR-17-5p          | up     |         |           |               |            |             |               |
| miR-20a-5p         | up     |         |           |               |            |             |               |
| miR-let7g-5p       | up     |         |           |               |            |             |               |
| miR-23b-3p         | up     |         |           |               |            |             |               |
| miR-19b-3p         | up     |         |           |               |            |             |               |
| miR-15a-5p         | up     |         |           |               |            |             |               |
| miR-491-3p         | up     |         |           |               |            |             |               |
| miR-4484           | down   |         |           |               |            |             |               |
| miR-143            | down   |         |           |               |            |             |               |
| miR-125B-5p        | down   |         |           |               |            |             |               |
| miR-30C-1-3p       | down   |         |           |               |            |             |               |
| miR-4534           | down   |         |           |               |            |             |               |

|             |      |     |             |         |            |          |              |  |
|-------------|------|-----|-------------|---------|------------|----------|--------------|--|
| miR-7491    | down |     |             |         |            |          |              |  |
| miR-711     | down |     |             |         |            |          |              |  |
| miR-5571    | down |     |             |         |            |          |              |  |
| miR-630-5p  | down |     |             |         |            |          |              |  |
| miR-483-5p  | down |     |             |         |            |          |              |  |
| miR-4741    | down |     |             |         |            |          |              |  |
| miR-4778-5p | down |     |             |         |            |          |              |  |
| miR-3158-5p | down |     |             |         |            |          |              |  |
| miR-320a    | down |     |             |         |            |          |              |  |
| miR-101     | down |     |             |         |            |          |              |  |
| miR-224     | down | 258 | 40 (NLN)    | FFPE    | qRT-PCR    | 1        | Ni 2015      |  |
| miR-155     | up   | 22  | 6 (NLN)     | Biopsie | qRT-PCR    | 1        | Huskova 2015 |  |
| miR-16-1    | up   |     |             |         |            |          |              |  |
| miR-16-2    | up   |     |             |         |            |          |              |  |
| miR-27a     | up   |     |             |         |            |          |              |  |
| miR-103     | up   | 63  | 5 GCB cells | FF      | qRT-PCR    | 11       | Troppan 2015 |  |
| miR-185     | up   |     |             |         |            |          |              |  |
| miR-199     | up   |     |             |         |            |          |              |  |
| miR-497     | up   |     |             |         |            |          |              |  |
| miR-21      | up   |     |             |         |            |          |              |  |
| miR-17-92** | up   | 200 | 11 (NT)     | FFPE    | qRT-PCR    | 3        | Go 2015      |  |
| miR-155     | up   |     |             |         |            |          |              |  |
| miR-126     | up   |     |             |         |            |          |              |  |
| miR-10b     | up   |     |             |         |            |          |              |  |
| miR-145     | up   |     |             |         |            |          |              |  |
| miR-126     | up   |     |             |         |            |          |              |  |
| miR-424     | up   |     |             |         |            |          |              |  |
| miR-134     | up   |     |             |         |            |          |              |  |
| miR-199a-2  | up   |     |             |         |            |          |              |  |
| miR-127     | up   |     |             |         |            |          |              |  |
| miR-379     | up   |     |             |         |            |          |              |  |
| miR-127     | up   |     |             |         |            |          |              |  |
| miR-199b    | up   |     |             |         |            |          |              |  |
| miR-143     | up   |     |             |         |            |          |              |  |
| miR-34a     | up   |     |             |         |            |          |              |  |
| miR-143     | up   |     |             |         |            |          |              |  |
| miR-144     | up   |     |             |         |            |          |              |  |
| miR-199b    | up   |     |             |         |            |          |              |  |
| miR-139     | up   |     |             |         |            |          |              |  |
| miR-199a-2  | up   |     |             |         |            |          |              |  |
| miR-130a    | up   |     |             |         |            |          |              |  |
| miR-542     | up   |     |             |         |            |          |              |  |
| miR-125a    | up   |     |             |         |            |          |              |  |
| miR-218-2   | up   |     |             |         |            |          |              |  |
| miR-99b     | up   | 92  | 15          | FF      | sequencing | miRNAome | Lim 2015     |  |
| miR-125b-2  | up   |     |             |         |            |          |              |  |
| miR-10a     | up   |     |             |         |            |          |              |  |
| miR-145     | up   |     |             |         |            |          |              |  |
| miR-455     | up   |     |             |         |            |          |              |  |
| miR-214     | up   |     |             |         |            |          |              |  |
| miR-628     | up   |     |             |         |            |          |              |  |
| miR-146b    | up   |     |             |         |            |          |              |  |
| miR-100     | up   |     |             |         |            |          |              |  |
| miR-497     | up   |     |             |         |            |          |              |  |
| miR-1301    | up   |     |             |         |            |          |              |  |
| miR-451a    | up   |     |             |         |            |          |              |  |
| miR-1247    | up   |     |             |         |            |          |              |  |
| miR-574     | up   |     |             |         |            |          |              |  |
| miR-195     | up   |     |             |         |            |          |              |  |
| miR-340     | up   |     |             |         |            |          |              |  |
| miR-326     | up   |     |             |         |            |          |              |  |
| miR-196a-2  | up   |     |             |         |            |          |              |  |
| miR-146b    | up   |     |             |         |            |          |              |  |
| miR-338     | up   |     |             |         |            |          |              |  |
| miR-675     | up   |     |             |         |            |          |              |  |
| miR-337     | up   |     |             |         |            |          |              |  |
| miR-511-2   | up   |     |             |         |            |          |              |  |

|              |      |         |            |        |               |     |                  |  |
|--------------|------|---------|------------|--------|---------------|-----|------------------|--|
| miR-10393-3p | up   |         |            |        |               |     |                  |  |
| miR-99a      | up   |         |            |        |               |     |                  |  |
| miR-22       | up   |         |            |        |               |     |                  |  |
| miR-let-7c   | up   |         |            |        |               |     |                  |  |
| miR-217      | up   |         |            |        |               |     |                  |  |
| miR-654      | up   |         |            |        |               |     |                  |  |
| miR-452      | up   |         |            |        |               |     |                  |  |
| miR-503      | up   |         |            |        |               |     |                  |  |
| miR-455      | up   |         |            |        |               |     |                  |  |
| miR-let-7b   | up   |         |            |        |               |     |                  |  |
| miR-let-7e   | up   |         |            |        |               |     |                  |  |
| miR-450a-2   | up   |         |            |        |               |     |                  |  |
| miR-136      | up   |         |            |        |               |     |                  |  |
| miR-let-7a-2 | up   |         |            |        |               |     |                  |  |
| miR-196b     | up   |         |            |        |               |     |                  |  |
| miR-22       | up   |         |            |        |               |     |                  |  |
| miR-362      | up   |         |            |        |               |     |                  |  |
| miR-224      | up   |         |            |        |               |     |                  |  |
| miR-203a     | down |         |            |        |               |     |                  |  |
| miR-205      | down |         |            |        |               |     |                  |  |
| miR-20b      | down |         |            |        |               |     |                  |  |
| NOVELM00290  | down |         |            |        |               |     |                  |  |
| miR-4491     | down |         |            |        |               |     |                  |  |
| miR-3150b    | down |         |            |        |               |     |                  |  |
| miR-28       | down |         |            |        |               |     |                  |  |
| miR-20b      | down |         |            |        |               |     |                  |  |
| miR-28       | down |         |            |        |               |     |                  |  |
| miR-129-2    | down |         |            |        |               |     |                  |  |
| miR-3917     | down |         |            |        |               |     |                  |  |
| miR-10392-5p | down |         |            |        |               |     |                  |  |
| miR-363      | down |         |            |        |               |     |                  |  |
| miR-486      | down |         |            |        |               |     |                  |  |
| miR-3934     | down |         |            |        |               |     |                  |  |
| miR-138-1    | down |         |            |        |               |     |                  |  |
| miR-3681     | down |         |            |        |               |     |                  |  |
| NOVELM00288  | down |         |            |        |               |     |                  |  |
| miR-138-1    | down |         |            |        |               |     |                  |  |
| miR-27a      | down |         |            |        |               |     |                  |  |
| miR-23a      | down |         |            |        |               |     |                  |  |
| miR-589      | down |         |            |        |               |     |                  |  |
| miR-10397-5p | down |         |            |        |               |     |                  |  |
| miR-4746     | down |         |            |        |               |     |                  |  |
| miR-151a     | down |         |            |        |               |     |                  |  |
| NOVELM00113  | down |         |            |        |               |     |                  |  |
| miR-331      | down |         |            |        |               |     |                  |  |
| miR-17       | down |         |            |        |               |     |                  |  |
| miR-942      | down |         |            |        |               |     |                  |  |
| miR-629      | down |         |            |        |               |     |                  |  |
| miR-128-2    | down |         |            |        |               |     |                  |  |
| miR-15b      | down |         |            |        |               |     |                  |  |
| miR-3615     | down |         |            |        |               |     |                  |  |
| miR-200b     | down |         |            |        |               |     |                  |  |
| miR-181a-1   | down |         |            |        |               |     |                  |  |
| miR-130b     | down |         |            |        |               |     |                  |  |
| miR-582      | down |         |            |        |               |     |                  |  |
| miR-616      | down |         |            |        |               |     |                  |  |
| miR-185      | down |         |            |        |               |     |                  |  |
| miR-200c     | NS   | 61      | 13 (NLN)   | Tissue | qRT-PCR       | 1   | Berglund<br>2013 |  |
| miR-150      | down |         |            |        |               |     |                  |  |
| miR-29b      | down |         |            |        |               |     |                  |  |
| miR-29a      | down |         |            |        |               |     |                  |  |
| miR-142-3p   | down | 45      | 10 (DC); 6 | FF and | qRT-PCR/array | 177 | Caramuta<br>2013 |  |
| miR-142-5p   | down | (DC);   | (VC)(NLN)  | FFPE   |               |     |                  |  |
| miR-145      | down | 75 (VC) |            |        |               |     |                  |  |
| miR-143      | down |         |            |        |               |     |                  |  |
| miR-195      | down |         |            |        |               |     |                  |  |
| miR-497      | down |         |            |        |               |     |                  |  |

|           |      |    |          |             |             |     |              |
|-----------|------|----|----------|-------------|-------------|-----|--------------|
| miR-494   | up   |    |          |             |             |     |              |
| miR-638   | up   |    |          |             |             |     |              |
| miR-21    | up   |    |          |             |             |     |              |
| miR-155   | up   |    |          |             |             |     |              |
| miR-16    | down | 12 | 7        | FFPE        | qRT-PCR     | 4   | Handal 2013  |
| miR-150   | up   |    |          |             |             |     |              |
| miR-155   | up   | 90 | 31 (RLN) | FFPE        | qRT-PCR     | 2   | Zhong 2012   |
| miR-146a  | up   |    |          |             |             |     |              |
| miR-18b   | up   |    |          |             |             |     |              |
| miR-19b   | up   |    |          |             |             |     |              |
| miR-20a   | up   |    |          |             |             |     |              |
| miR-92    | up   |    |          |             |             |     |              |
| miR-93    | up   | 36 | 5 (NLN)  | Tissue      | qRT-PCR     | 8   | Fassina 2012 |
| miR-106a  | up   |    |          |             |             |     |              |
| miR-150   | down |    |          |             |             |     |              |
| miR-210   | up   |    |          |             |             |     |              |
| miR-210   | up   |    |          |             |             |     |              |
| miR-155   | up   |    |          |             |             |     |              |
| miR-106a  | up   |    |          |             |             |     |              |
| miR-17-5p | up   |    |          |             |             |     |              |
| miR-150   | down |    |          |             |             |     |              |
| miR-145   | down |    |          |             |             |     |              |
| miR-328   | down |    |          |             |             |     |              |
| miR-139   | down | 58 | 7 (NLN)  | FFPE        | qRT-PCR     | 157 | Roehle 2008  |
| miR-99a   | down |    |          |             |             |     |              |
| miR-10a   | down |    |          |             |             |     |              |
| miR-95    | down |    |          |             |             |     |              |
| miR-149   | down |    |          |             |             |     |              |
| miR-let7e | down |    |          |             |             |     |              |
| miR-320   | down |    |          |             |             |     |              |
| miR-151   | down |    |          |             |             |     |              |
| miR-21    | up   |    |          |             |             |     |              |
| miR-155   | up   | 48 | 6 (NBC)  | FF and FFPE | qRT-PCR     | 3   | Lawrie 2007  |
| miR-221   | up   |    |          |             |             |     |              |
| miR-155   | up   | 23 | 2        | FF          | Semi RT-PCR | 1   | Eis 2005     |

\*expression of miR-27b-3p was confirmed by qRT-PCR assays in 202 DLBCL and 10 RLH samples. \*\*miR-17-92 cluster. RLH: Reactive lymphoid hyperplasia; NLN: normal lymph node tissues; NT: normal tonsil; FF: fresh frozen; FFPE: formalin-fixed paraffin-embedded; DC:discovery cohort; VC: validation cohort; NBC: normal B cell samples.

**Table S2.** Differentially expressed microRNAs in DLBCL subtypes.

| Significant miRNAs | Result   | n   |     | Sample source | Method        | N° miRNAs | Reference    |
|--------------------|----------|-----|-----|---------------|---------------|-----------|--------------|
|                    |          | GCB | ABC |               |               |           |              |
| miR-21             | Down GCB | 19  | 36  | FF and FFPE   | qRT-PCR       | 1         | Liu 2017     |
| 0                  | -        | 29  | 29  | FF            | qRT-PCR       | 1         | Marques 2016 |
| 0                  | -        | 6   | 15  | Biopsie       | qRT-PCR       | 1         | Huskova 2015 |
| miR-155            | Down GCB | 53  | 95  | FFPE          | qRT-PCR       | 8         | Go 2015      |
| miR-28-3p          | Up GCB   |     |     |               |               |           |              |
| miR-28-5p          | Up GCB   |     |     |               |               |           |              |
| miR-331-5p         | Up GCB   |     |     |               |               |           |              |
| miR-589            | Up GCB   | 32  | 27  | FFPE          | qRT-PCR/array | 377       | Iqbal 2015   |
| miR-129-3p         | Up GCB   |     |     |               |               |           |              |
| miR-597            | Up GCB   |     |     |               |               |           |              |
| miR-542-3p         | Down GCB |     |     |               |               |           |              |
| miR-155            | Down GCB |     |     |               |               |           |              |

---

|              |          |    |    |    |            |          |          |
|--------------|----------|----|----|----|------------|----------|----------|
| mir-1270     | Up GCB   |    |    |    |            |          |          |
| mir-129-1-3p | Up GCB   |    |    |    |            |          |          |
| mir-129-2-3p | Up GCB   |    |    |    |            |          |          |
| mir-129-5p   | Up GCB   |    |    |    |            |          |          |
| mir-138-1-3p | Up GCB   |    |    |    |            |          |          |
| mir-138-5p   | Up GCB   |    |    |    |            |          |          |
| mir-151a-3p  | Up GCB   |    |    |    |            |          |          |
| mir-151b     | Up GCB   |    |    |    |            |          |          |
| mir-181a-5p  | Up GCB   |    |    |    |            |          |          |
| mir-196b-5p  | Up GCB   |    |    |    |            |          |          |
| mir-210-3p   | Up GCB   |    |    |    |            |          |          |
| mir-28-3p    | Up GCB   |    |    |    |            |          |          |
| mir-28-5p    | Up GCB   |    |    |    |            |          |          |
| mir-301a-5p  | Up GCB   |    |    |    |            |          |          |
| mir-3074-5p  | Up GCB   |    |    |    |            |          |          |
| mir-30e-3p   | Up GCB   |    |    |    |            |          |          |
| mir-3150b-3p | Up GCB   |    |    |    |            |          |          |
| mir-331-3p   | Up GCB   |    |    |    |            |          |          |
| mir-339-3p   | Up GCB   |    |    |    |            |          |          |
| mir-3681-5p  | Up GCB   |    |    |    |            |          |          |
| mir-3934-3p  | Up GCB   | 41 | 30 | FF | sequencing | miRNAome | Lim 2015 |
| mir-423-3p   | Up GCB   |    |    |    |            | e        |          |
| mir-4746-5p  | Up GCB   |    |    |    |            |          |          |
| mir-582-3p   | Up GCB   |    |    |    |            |          |          |
| mir-582-5p   | Up GCB   |    |    |    |            |          |          |
| mir-589-3p   | Up GCB   |    |    |    |            |          |          |
| mir-589-5p   | Up GCB   |    |    |    |            |          |          |
| mir-598-3p   | Up GCB   |    |    |    |            |          |          |
| mir-664a-3p  | Up GCB   |    |    |    |            |          |          |
| mir-744-5p   | Up GCB   |    |    |    |            |          |          |
| mir-10397-5p | Down GCB |    |    |    |            |          |          |
| mir-106a-5p  | Down GCB |    |    |    |            |          |          |
| mir-10b-5p   | Down GCB |    |    |    |            |          |          |
| mir-148a-5p  | Down GCB |    |    |    |            |          |          |
| mir-155-3p   | Down GCB |    |    |    |            |          |          |
| mir-155-5p   | Down GCB |    |    |    |            |          |          |
| mir-17-5p    | Down GCB |    |    |    |            |          |          |
| mir-20a-5p   | Down GCB |    |    |    |            |          |          |
| mir-21-3p    | Down GCB |    |    |    |            |          |          |
| mir-221-3p   | Down GCB |    |    |    |            |          |          |
| mir-222-3p   | Down GCB |    |    |    |            |          |          |

---

|              |          |     |     |             |               |     |                       |
|--------------|----------|-----|-----|-------------|---------------|-----|-----------------------|
| mir-222-5p   | Down GCB |     |     |             |               |     |                       |
| mir-29b-1-5p | Down GCB |     |     |             |               |     |                       |
| mir-30b-3p   | Down GCB |     |     |             |               |     |                       |
| mir-30d-3p   | Down GCB |     |     |             |               |     |                       |
| mir-320a     | Down GCB |     |     |             |               |     |                       |
| mir-363-3p   | Down GCB |     |     |             |               |     |                       |
| mir-424-5p   | Down GCB |     |     |             |               |     |                       |
| mir-503-5p   | Down GCB |     |     |             |               |     |                       |
| mir-625-3p   | Down GCB |     |     |             |               |     |                       |
| mir-625-5p   | Down GCB |     |     |             |               |     |                       |
| mir-92a-1-5p | Down GCB |     |     |             |               |     |                       |
| NOVELM00     | Down GCB |     |     |             |               |     |                       |
| 288          |          |     |     |             |               |     |                       |
| 0            | -        | 140 | 118 | FFPE        | qRT-PCR       | 1   | Ni 2015               |
| miR-199a     | Up GCB   | 36  | 17  | FF          | qRT-PCR       | 11  | Troppan 2015          |
| miR-497      | Up GCB   |     |     |             |               |     |                       |
| miR-320d     | Down GCB | 47  | 59  | FFPE        | qRT-PCR       | 2   | Wu 2014               |
| miR-155      | Down GCB | 20  | 34  | FF and FFPE | qRT-PCR/array | 177 | Caramuta 2013         |
| miR-146a     | Down GCB |     |     |             |               |     |                       |
| miR-155      | Down GCB | 36  | 31  | FF          | qRT-PCR       | 1   | Huang 2012            |
| 0            | -        | 10  | 8   | FF          | qRT-PCR       | 2   | Kim 2012              |
| miR-155      | Down GCB | 21  | 69  | FFPE        | qRT-PCR       | 2   | Zhong 2012            |
| miR-146a     | Down GCB |     |     |             |               |     |                       |
| miR-331      | Up GCB   |     |     |             |               |     |                       |
| miR-151      | Up GCB   |     |     |             |               |     |                       |
| miR-28       | Up GCB   |     |     |             |               |     |                       |
| miR-454-3p   | Up GCB   | 11  | 18  | FFPE        | qRT-PCR/array | 470 | Montes-Moreno<br>2011 |
| miR-222      | Down GCB |     |     |             |               |     |                       |
| miR-144      | Down GCB |     |     |             |               |     |                       |
| miR-451      | Down GCB |     |     |             |               |     |                       |
| miR-221      | Down GCB |     |     |             |               |     |                       |
| 0            | -        | 8   | 17  | FFPE        | qRT-PCR       | 3   | Nie 2010              |
| miR-129      | Up GCB   |     |     |             |               |     |                       |
| miR-138      | Up GCB   |     |     |             |               |     |                       |
| miR-199b     | Up GCB   |     |     |             |               |     |                       |
| miR-421      | Up GCB   |     |     |             |               |     |                       |
| miR-520h     | Up GCB   | 32  | 28  | FFPE        | Array         | 464 | Lawrie 2009           |
| miR-569      | Up GCB   |     |     |             |               |     |                       |
| miR-616      | Up GCB   |     |     |             |               |     |                       |
| miR-620      | Up GCB   |     |     |             |               |     |                       |
| miR-653      | Up GCB   |     |     |             |               |     |                       |

|            |          |    |    |        |         |     |             |
|------------|----------|----|----|--------|---------|-----|-------------|
| miR-132    | Down GCB |    |    |        |         |     |             |
| miR-146b   | Down GCB |    |    |        |         |     |             |
| miR-155    | Down GCB |    |    |        |         |     |             |
| miR-186    | Down GCB |    |    |        |         |     |             |
| miR-190    | Down GCB |    |    |        |         |     |             |
| miR-194    | Down GCB |    |    |        |         |     |             |
| miR-21     | Down GCB |    |    |        |         |     |             |
| miR-213    | Down GCB |    |    |        |         |     |             |
| miR-221    | Down GCB |    |    |        |         |     |             |
| miR-222    | Down GCB |    |    |        |         |     |             |
| miR-301    | Down GCB |    |    |        |         |     |             |
| miR-30d    | Down GCB |    |    |        |         |     |             |
| miR-340    | Down GCB |    |    |        |         |     |             |
| miR-363    | Down GCB |    |    |        |         |     |             |
| miR-422b   | Down GCB |    |    |        |         |     |             |
| miR-518a   | Down GCB |    |    |        |         |     |             |
| miR-660    | Down GCB |    |    |        |         |     |             |
| miR-106b   | NA       |    |    |        |         |     |             |
| miR-140-3p | NA       |    |    |        |         |     |             |
| miR-142-3p | NA       |    |    |        |         |     |             |
| miR-142-5p | NA       |    |    |        |         |     |             |
| miR-151-5p | NA       |    |    |        |         |     |             |
| miR-16     | NA       |    |    |        |         |     |             |
| miR-184    | NA       |    |    |        |         |     |             |
| miR-191    | NA       |    |    |        |         |     |             |
| miR-19a    | NA       |    |    |        |         |     |             |
| miR-19b    | NA       | 20 | 20 | Tissue | Array   | 113 | Zhang 2009  |
| miR-20a    | NA       |    |    |        |         |     |             |
| miR-28-5p  | NA       |    |    |        |         |     |             |
| miR-299-5p | NA       |    |    |        |         |     |             |
| miR-30c    | NA       |    |    |        |         |     |             |
| miR-30e    | NA       |    |    |        |         |     |             |
| miR-30e*   | NA       |    |    |        |         |     |             |
| miR-32     | NA       |    |    |        |         |     |             |
| miR-526b*  | NA       |    |    |        |         |     |             |
| miR-583    | NA       |    |    |        |         |     |             |
| miR-129    | NA       |    |    |        |         |     |             |
| miR-133a   | NA       |    |    |        |         |     |             |
| miR-133b   | NA       | 25 | 25 | FFPE   | qRT-PCR | 157 | Roehle 2008 |
| miR-138    | NA       |    |    |        |         |     |             |
| miR-151    | NA       |    |    |        |         |     |             |

|          |          |    |    |             |               |   |             |
|----------|----------|----|----|-------------|---------------|---|-------------|
| miR-155  | NA       |    |    |             |               |   |             |
| miR-199b | NA       |    |    |             |               |   |             |
| miR-27b  | NA       |    |    |             |               |   |             |
| miR-155  | Down GCB |    |    |             |               |   |             |
| miR-21   | Down GCB | 16 | 18 | FF and FFPE | qRT-PCR       | 3 | Lawrie 2007 |
| miR-221  | Down GCB |    |    |             |               |   |             |
| miR-155  | Down GCB | 4  | 19 | FF          | Semiq. RT-PCR | 1 | Eis 2005    |

GCB: Germinal center B-cell like; FF: fresh frozen; FFPE: formalin-fixed paraffin-embedded; NA: not available.

**Table S3.** Differentially expressed microRNAs as prediction to response to R-CHOP therapy.

| Significant miRNAs | Result | n DLBCL | Sample source | Method      | N° miRNAs | Reference    |
|--------------------|--------|---------|---------------|-------------|-----------|--------------|
| miR-27             | FR     | 201     | Tissue        | nanosttring | 800       | Jia 2017     |
| miR-34a            | FR     | 62      | FF            | qRT-PCR     | 1         | Marques 2016 |
| 0                  | -      | 22      | Biopsie       | qRT-PCR     | 1         | Huskova 2015 |
| miR-224            | FR     | 258     | FFPE          | qRT-PCR     | 1         | Ni 2015      |
| hsa-miR-155        | UFR    | 90      | FFPE          | qRT-PCR     | 2         | Zhong 2012   |
| hsa-miR-146        | UFR    |         |               |             |           |              |

UFR: unfavorable response; FR: favorable response; FF: fresh frozen; FFPE: formalin-fixed paraffin-embedded.

**Table S4.** Differentially expressed microRNAs as prognosis biomarkers.

| Significant miRNAs | Result               | n DLBCL | Sample source | Method        | N° miRNAs | Reference          |
|--------------------|----------------------|---------|---------------|---------------|-----------|--------------------|
| miR-27b            | Down: ↓ OS           | 202     | Tissue        | qRT-PCR       | 1         | Jia 2017           |
| miR-34a            | Up: ↑ OS             | 62      | FF            | qRT-PCR       | 1         | Marques 2016       |
| miR-155            | Up: lower survival   | 118     | FF            | qRT-PCR       | 1         | Zhu 2016           |
| miR-23a            | Up: ↓ OS             | 104     | FFPE          | qRT-PCR       | 1         | Wang 2014          |
| miR-155            | Up: ↓ OS             |         |               |               |           |                    |
| miR-16             | Up: ↓ OS             | 79      | FFPE          | qRT-PCR       | 8         | Iqbal 2015         |
| miR-363            | Up: ↓ OS             |         |               |               |           |                    |
| miR-24             | Up: ↑ OS             |         |               |               |           |                    |
| miR-214-5p         | Up: ↑ OS and EFS     |         |               |               |           |                    |
| miR-28-5p          | Up: ↑ OS and EFS     |         |               |               |           |                    |
| miR-324-5p         | Up: ↓ OS and PFS     |         |               |               |           |                    |
| miR-339-3p         | Up: ↑ OS and EFS     | 92      | FF            | sequencing    | miRNAome  | Lim 2015           |
| miR-5586-5p        | Up: ↑ OS and EFS     |         |               |               |           |                    |
| NOVELM00203M       | Up: ↓ OS and PFS     |         |               |               |           |                    |
| miR-224            | Up: ↑ OS and PFS     | 258     | FFPE          | qRT-PCR       | 1         | Ni 2015            |
| miR-17-5p          | Up: poor prognosis   |         |               |               |           |                    |
| miR-19-3p          | Up: poor prognosis   |         |               |               |           |                    |
| miR-20a-5p         | Up: poor prognosis   |         |               |               |           |                    |
| miR-106a-5p        | Up: poor prognosis   |         |               |               |           |                    |
| miR-150-5p*        | Down: poor prognosis | 83      | FFPE          | qRT-PCR/array | ±900      | Shepshelovich 2015 |
| miR-342-3p*        | Down: poor prognosis |         |               |               |           |                    |
| miR-181a-5p        | Down: poor prognosis |         |               |               |           |                    |
| miR-140-3p         | Down: poor prognosis |         |               |               |           |                    |
| miR-199a           | Up: ↑ OS and DFS     | 58      | FF            | qRT-PCR       | 11        | Troppan 2015       |



|             |                    |          |             |               |       |                    |
|-------------|--------------------|----------|-------------|---------------|-------|--------------------|
| miR-497     | Up: ↑ OS and DFS   |          |             |               |       |                    |
| miR-17-92   | Up: ↓ OS and PFS   |          |             |               |       |                    |
| miR-21      | Up: ↓ OS and PFS   | 200      | FFPE        | qRT-PCR       | 3     | Go 2015            |
| miR-146b-5p | Down: ↓ PFS        | 12 (DC); |             |               |       |                    |
| miR-320d    | Down: ↓ PFS and OS | 106 (VC) | FFPE        | qRT-PCR       | 939   | Wu 2014            |
| miR-200c    | Up: ↓ OS           | 61       | Tissue      | qRT-PCR       | 1     | Berglund 2013      |
| miR-146a    | Down: ↑ PFS        |          |             |               |       |                    |
| miR-155     | Down: ↑ PFS        | 90       | FFPE        | qRT-PCR       | 2     | Zhong 2012         |
| miR-181     | Up: ↑ PFS          |          |             |               |       |                    |
| miR-18a     | Up: ↓ OS           | 176      | FFPE        | qRT-PCR       | 11    | Alencar 2011       |
| miR-222     | Up: ↓ OS           |          |             |               |       |                    |
| miR-221     | Up: ↑ PFS and OS   |          |             |               |       |                    |
| miR-331     | Up: ↑ PFS and OS   |          |             |               |       |                    |
| miR-222     | Up: ↓ PFS and OS   |          |             |               |       |                    |
| miR-93      | Up: ↓ PFS and OS   |          |             |               |       |                    |
| miR-148a    | NA                 | 36/240   | FFPE        | qRT-PCR/array | 470/9 | Montes-Moreno 2011 |
| miR-151     | NA                 |          |             |               |       |                    |
| miR-28      | NA                 |          |             |               |       |                    |
| miR-451     | NA                 |          |             |               |       |                    |
| miR-491     | NA                 |          |             |               |       |                    |
| miR-100     | Up: ↑ EFS          |          |             |               |       |                    |
| miR-199a*   | Up: ↑ EFS          |          |             |               |       |                    |
| miR-199b    | Up: ↑ EFS          |          |             |               |       |                    |
| miR-23a     | Up: ↑ EFS          |          |             |               |       |                    |
| miR-24      | Up: ↑ EFS          |          |             |               |       |                    |
| miR-27a     | Up: ↑ EFS          |          |             |               |       |                    |
| miR-30e     | Up: ↑ EFS          | 64       | FFPE        | Array         | 464   | Lawrie 2009        |
| miR-330     | Up: ↑ EFS          |          |             |               |       |                    |
| miR-425     | Up: ↑ EFS          |          |             |               |       |                    |
| miR-302     | Up: ↓ EFS          |          |             |               |       |                    |
| miR-608     | Up: ↓ EFS          |          |             |               |       |                    |
| miR-637     | Up: ↓ EFS          |          |             |               |       |                    |
| miR-222     | Up: ↓ OS and PFS   | 106      | FFPE        | qRT-PCR       | 3     | Malumbres 2009     |
| let-7g      | Down: ↑ EFS        |          |             |               |       |                    |
| miR-195     | Down: ↑ EFS        |          |             |               |       |                    |
| miR-19a     | Down: ↑ OS         |          |             |               |       |                    |
| miR-21      | Down: ↑ OS         | 58       | Biopsie     | qRT-PCR       | 157   | Roehle 2008        |
| miR-23a     | Down: ↑ OS         |          |             |               |       |                    |
| miR-27a     | Down: ↑ OS         |          |             |               |       |                    |
| miR-34a     | Down: ↑ OS         |          |             |               |       |                    |
| miR-127     | Up: ↓ OS and PFS   |          |             |               |       |                    |
| miR-21      | Up: ↑ RFS          | 35       | FF and FFPE | qRT-PCR       | 3     | Lawrie 2007        |

\*were validated in an independent set of 13 samples FF: fresh frozen; FFPE: formalin-fixed paraffin-embedded; OS: overall survival, PFS: progression-free survival; EFS: event free survival; RFS: relapse free survival.

**Table S5.** Pathways significantly enriched among hsa-miR-155-5p and hsa-miR-21-5p (DLBCL diagnosis) target genes predicted by 6 or more databases.

| miRNA                                          | pathway name                                | set size | candidates contained | p-value  | FDR      | pathway source |
|------------------------------------------------|---------------------------------------------|----------|----------------------|----------|----------|----------------|
| miR-155-5p<br>miR-21-5p<br>(2644 target genes) | Diseases of signal transduction             | 247      | 68 (27.5%)           | 1.03e-08 | 1.76e-05 | Reactome       |
|                                                | MAPK signaling pathway-Homo sapiens (human) | 295      | 73 (24.7%)           | 3.42e-07 | 0.000293 | KEGG           |
|                                                | Signaling by Receptor Tyrosine Kinases      | 422      | 94 (22.3%)           | 1.34e-06 | 0.000767 | Reactome       |

|                                                    |     |             |          |         |          |
|----------------------------------------------------|-----|-------------|----------|---------|----------|
| Pathways in cancer - Homo sapiens (human)          | 526 | 111 (21.1%) | 2.45e-06 | 0.00105 | KEGG     |
| Prolactin signaling pathway - Homo sapiens (human) | 70  | 24 (34.3%)  | 1.25e-05 | 0.00295 | KEGG     |
| IRS-related events triggered by IGF1R              | 49  | 19 (38.8%)  | 1.35e-05 | 0.00295 | Reactome |

set size: # of genes in the pathway; candidates contained:# of gene targets in the pathway; p-value: absolute p-value; FDR: corrected p-value by "False Discovery Rate" method; pathway source: associated database.

Table S6. Pathways significantly enriched among hsa-miR-155-5p, hsa-miR-221-3p (DLBCL subtype) target genes predicted by 6 or more databases.

| miRNA                                 | pathway name                                                                    | set size | candidates contained | p-value  | FDR      | pathway source |
|---------------------------------------|---------------------------------------------------------------------------------|----------|----------------------|----------|----------|----------------|
| <b>miR-155-5p</b>                     | Membrane Trafficking                                                            | 582      | 145 (24.9%)          | 5.34e-11 | 9.16e-08 | Reactome       |
|                                       | Vesicle-mediated transport                                                      | 422      | 103 (24.4%)          | 1.09e-07 | 6.25e-05 | Reactome       |
| <b>miR-221-3p (2793 target genes)</b> | <b>Signaling by Receptor Tyrosine Kinases</b>                                   | 422      | 103 (24.4%)          | 1.09e-07 | 6.25e-05 | Reactome       |
|                                       | Diseases of signal transduction                                                 | 247      | 67 (27.1%)           | 3.51e-07 | 0.000136 | Reactome       |
|                                       | Signaling pathways regulating pluripotency of stem cells - Homo sapiens (human) | 139      | 44 (31.7%)           | 3.98e-07 | 0.000136 | KEGG           |
|                                       | Gene expression (Transcription)                                                 | 1372     | 266 (19.4%)          | 8.21e-07 | 0.000189 | Reactome       |

## References

1

2

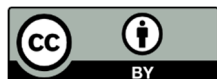

© 2019 by the authors. Submitted for possible open access publication under the terms and conditions of the Creative Commons Attribution (CC BY) license (<http://creativecommons.org/licenses/by/4.0/>).
